# Supplementary material for: miRNA-1183-targeted regulation of Bcl-2 contributes to the pathogenesis of rheumatic heart disease
Source: PubMed Central journal article supplement (PMC7607189; doi:10.1042/bsr20201573), 2020-11-02
Supplement: BSR-2020-1573_supp.pdf [file BSR-2020-1573_supp.pdf]

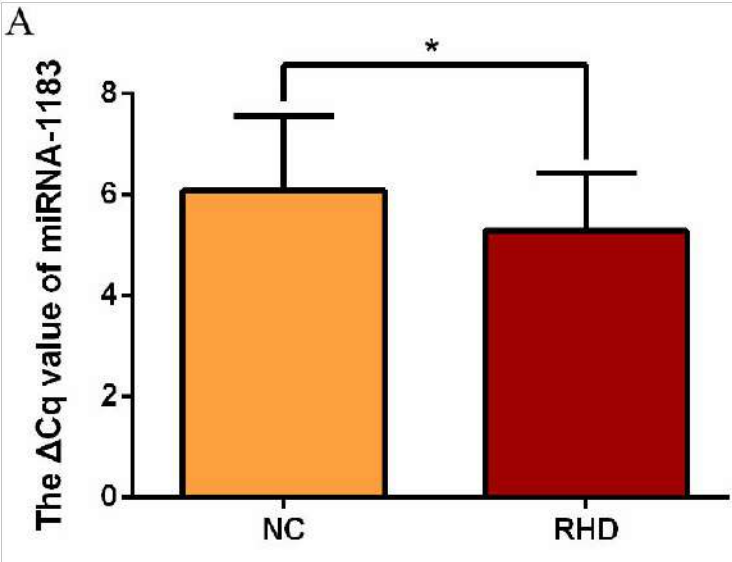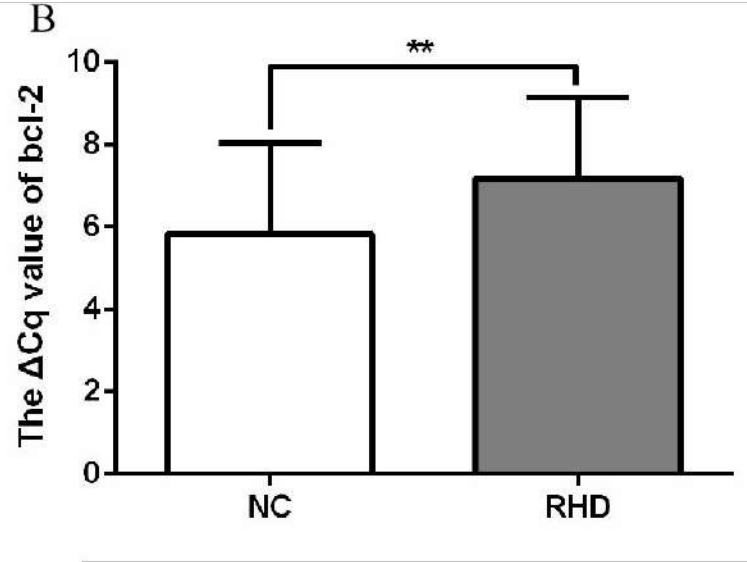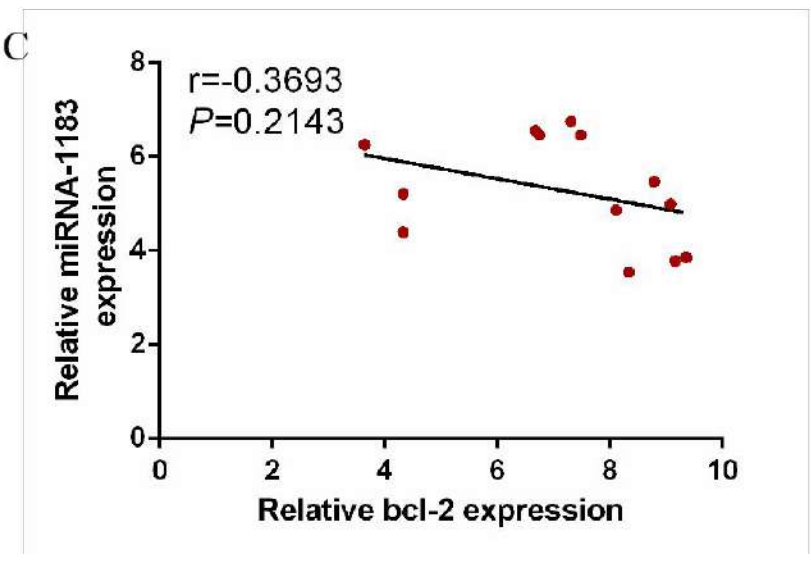

**Supplementary Figure 1. MiRNA-1183 and bcl-2 mRNA expression levels in RHD cases and healthy normal control samples.** (A) The expression levels of miRNA-1183 expression in RHD cases were significantly lower than healthy normal control samples (n = 13), \*P < 0.05. (B) The expression levels of bcl-2 mRNA was significantly downregulated in RHD cases compared with the healthy normal control samples,\*\*P <0.01. (C)Correlation between miR-1183 and BCL-2. Higher  $\Delta Cq$  value means lower expression.

NC

MiR-1183 inhibitor

MiR-1183 mimics

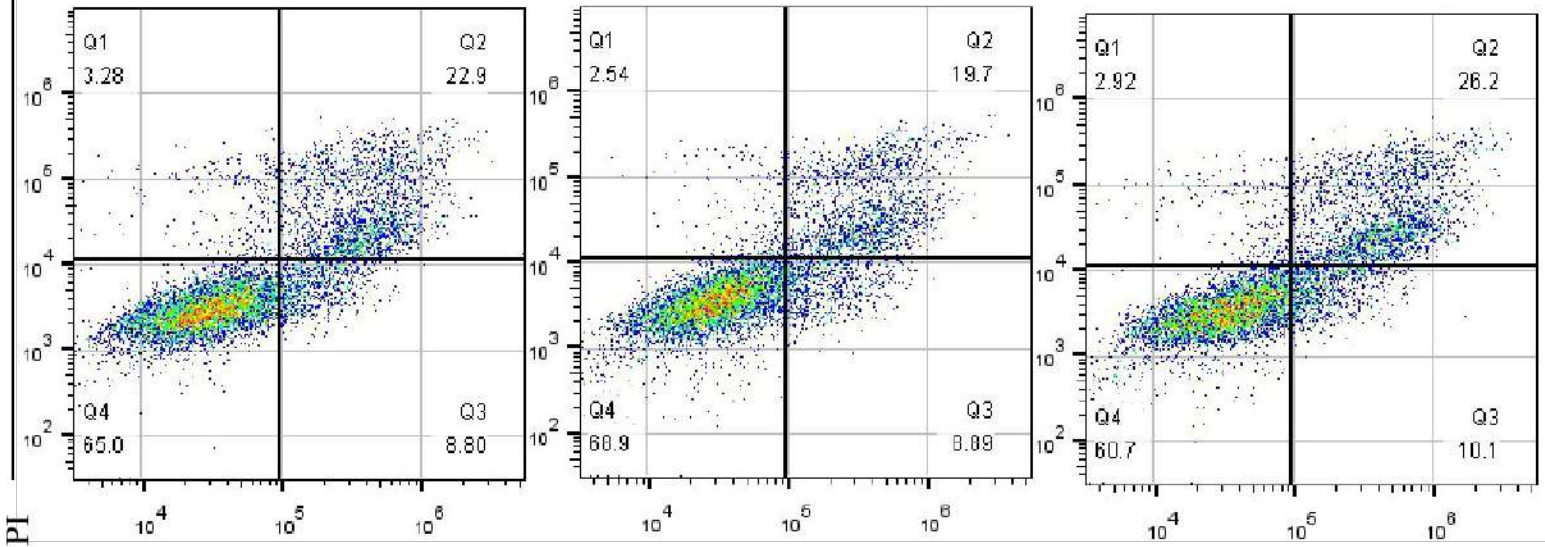

FITC

**Supplementary Figure 2. Flow cytometry was used to detect the apoptotic ability on H9C2 cell.**

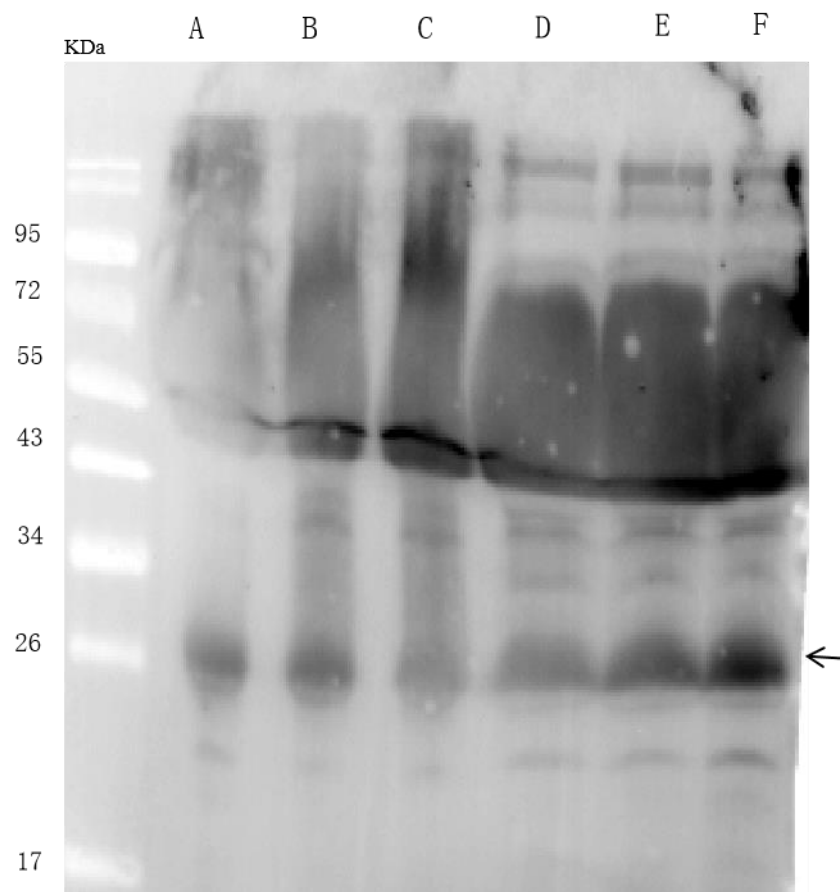

**Supplementary Figure 3. Western Blot for the detection the plasma expression of Bcl-2 in RHD patients with high expression of mir-1183.A-C: 3 cases of RHD groups;D-F: 3 control groups.**
